# Supplementary material
Source: PubMed Central journal article supplement (PMC6214685)

**Cell Systems, Volume 7**

## **Supplemental Information**

### **The Cell Cycle Browser: An Interactive Tool for Visualizing, Simulating, and Perturbing Cell-Cycle Progression**

**David Borland, Hong Yi, Gavin D. Grant, Katarzyna M. Kedziora, Hui Xiao Chao, Rachel A. Haggerty, Jayashree Kumar, Samuel C. Wolff, Jeanette G. Cook, and Jeremy E. Purvis**

**Figure S1. Pipeline for data flow, Related to Figure 1.**

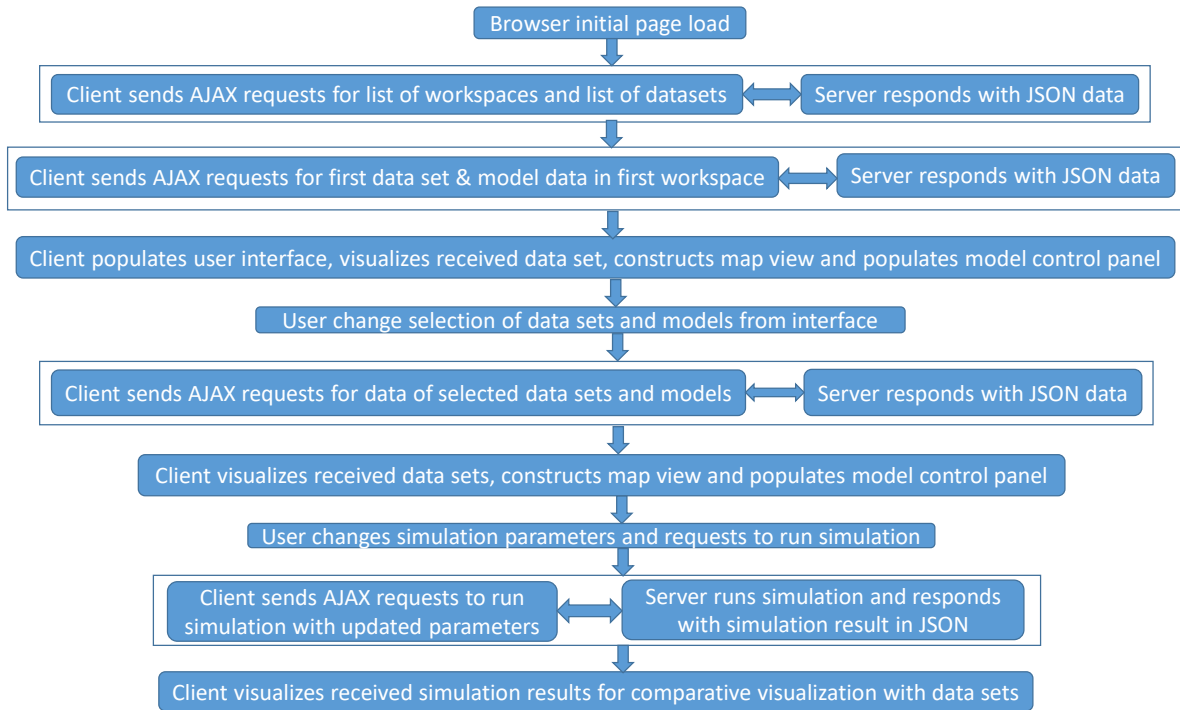

Supplement: NIHMS990414-supplement-1.pdf [file NIHMS990414-supplement-1.pdf]
